# Supplementary material
Source: MDPI journal article supplement (https://www.mdpi.com/2673-7256/4/2/14)
Supplement: s1 [file s1 › photochem-2912845-supplementary.pdf]

Supplementary Material

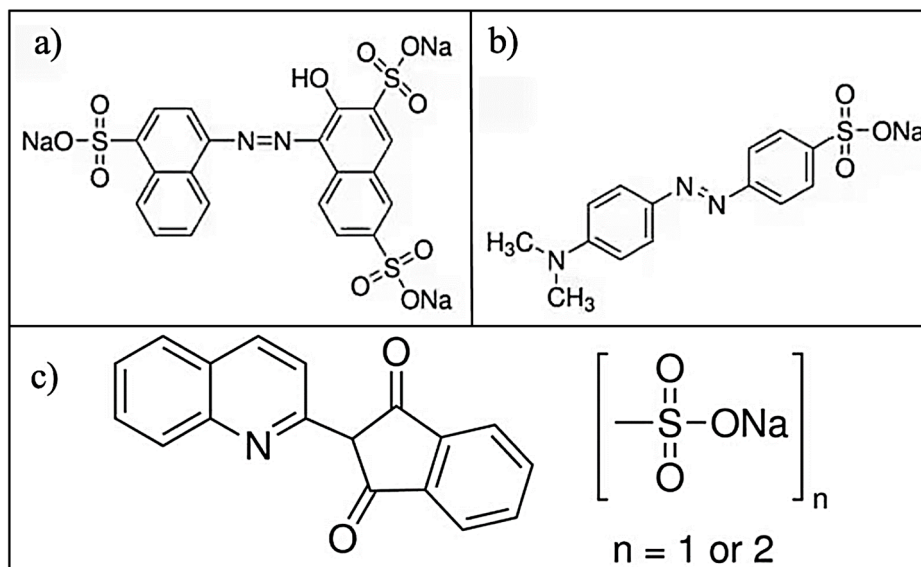

**Figure S1.** Skeletal structures of (a) Amaranth, (b) Methyl Orange, and (c) Quinoline Yellow, all anionic dyes.

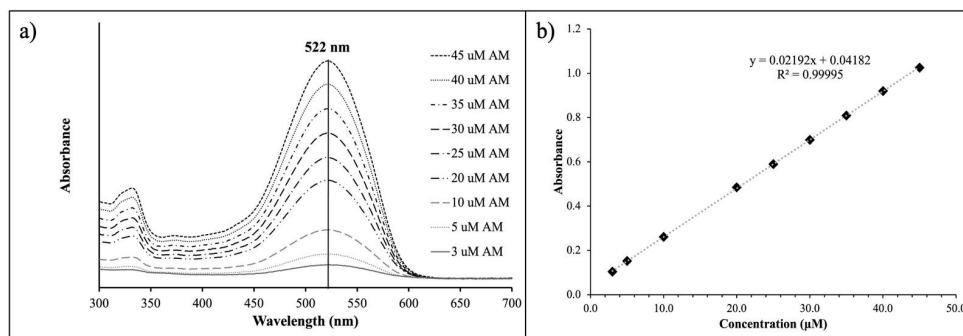

**Figure S2.** (a) UV-Vis spectra and (b) calibration curve of Amaranth.

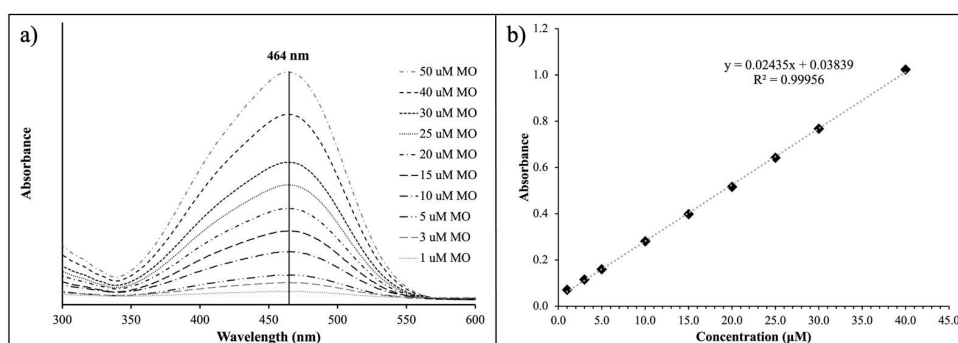

**Figure S3.** (a) UV-Vis spectra and (b) calibration curve of Methyl Orange.

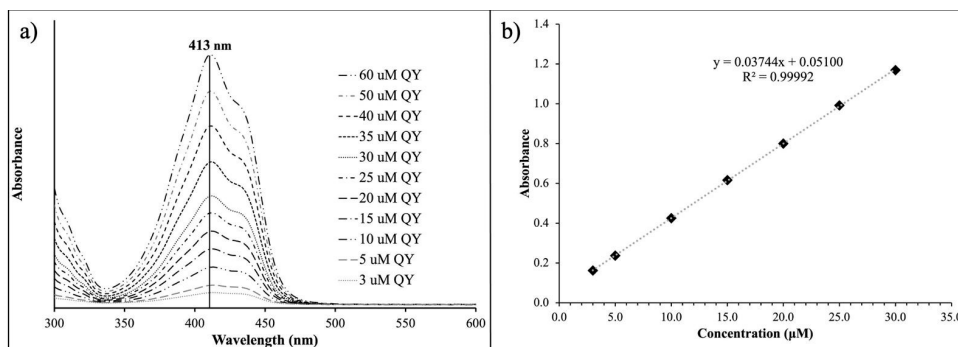

**Figure S4.** (a) UV-Vis spectra and (b) calibration curve of Quinoline Yellow.
